# Supplementary material for: Raman spectroscopic insights into the glass transition of poly(methyl methacrylate)
Source: Royal Society of Chemistry journal article supplement (doi:10.1039/d0cp05627h), 2020-12-11
Supplement: d0cp05627h1.pdf [file d0cp05627h1.pdf]

Supplementary Figure.

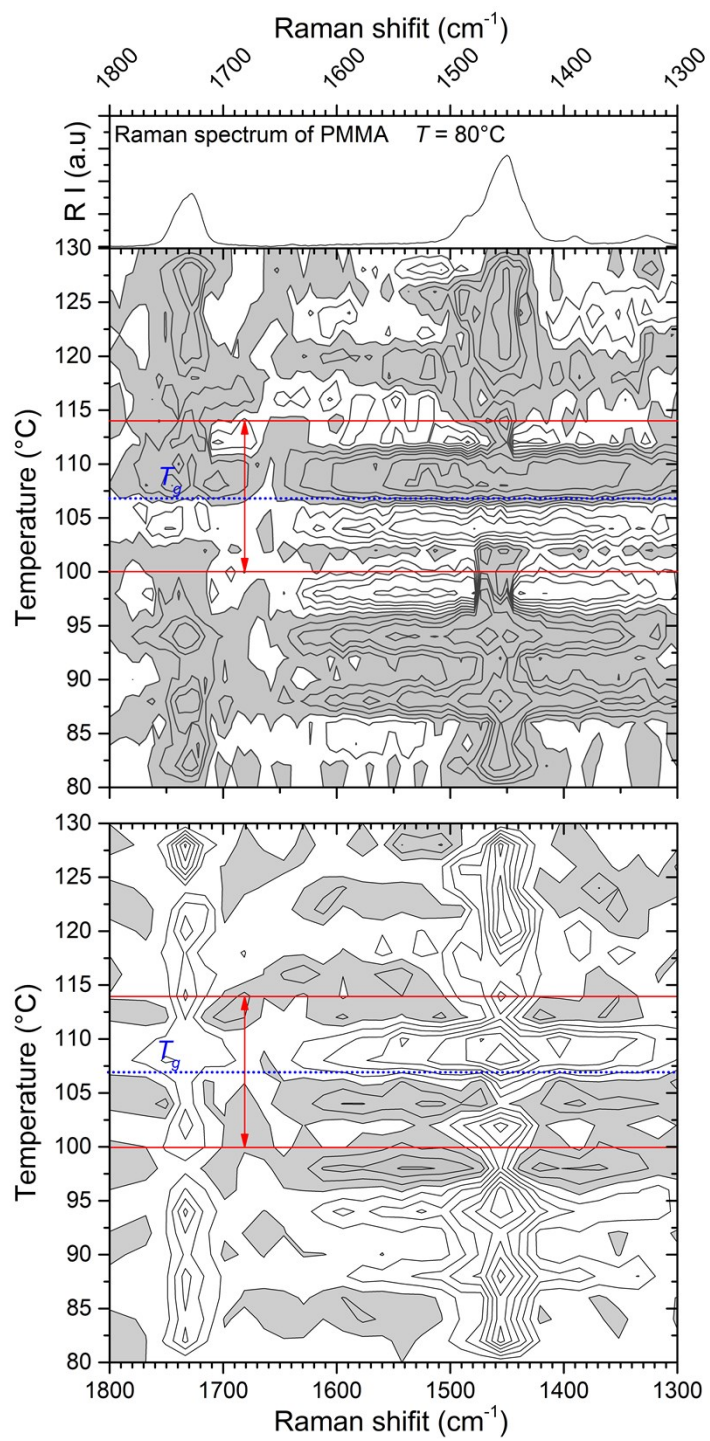

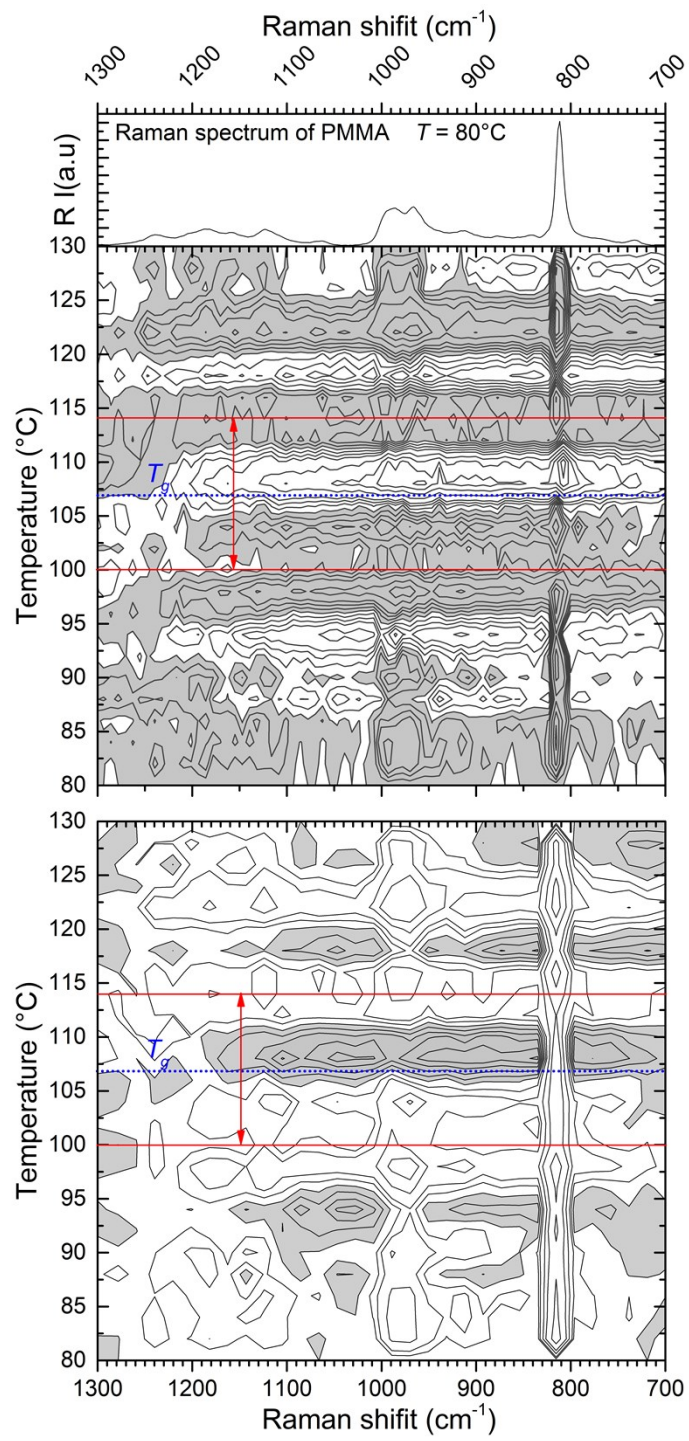

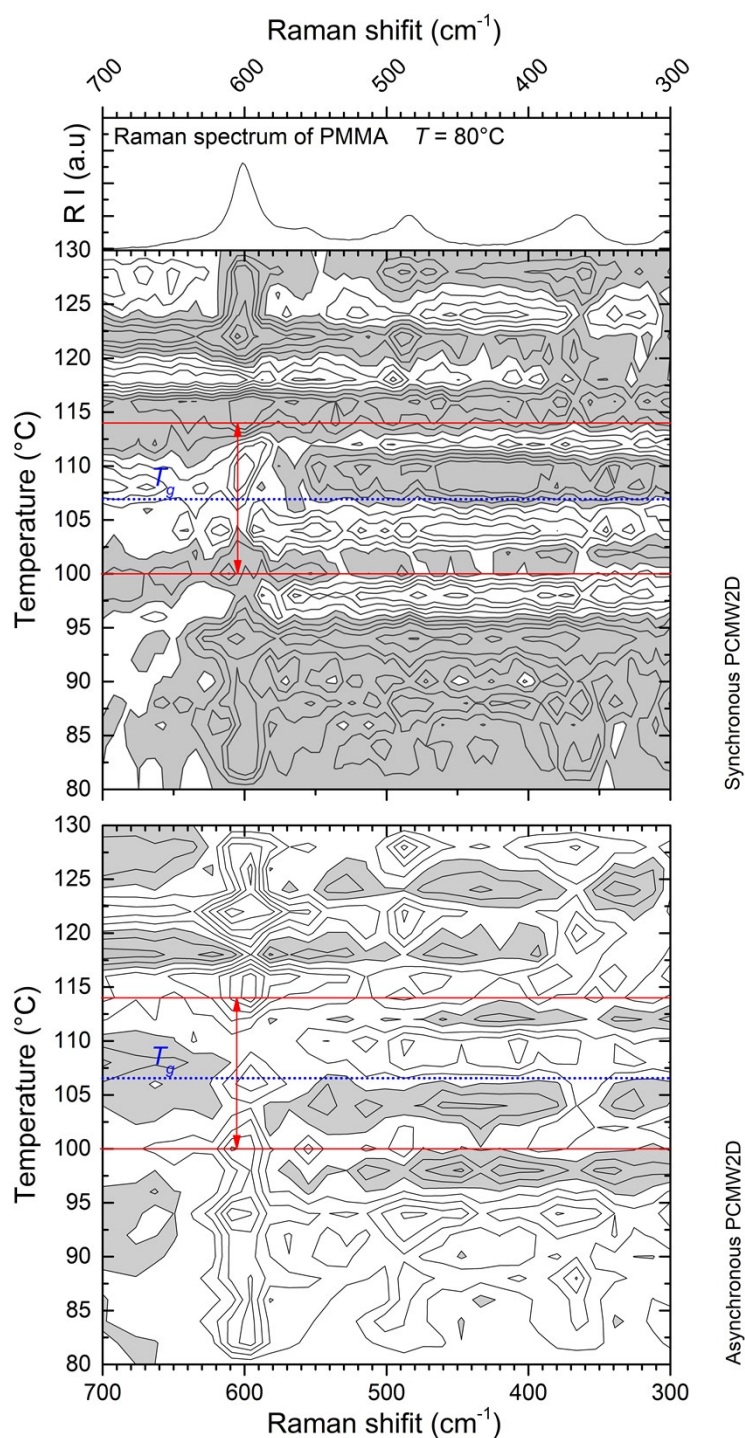

**Supplementary figure 1.** On the top the depolarized Raman spectrum of atactic PMMA, recorded at 80°C, is shown for the spectral regions a) from 1800 to 1300 cm<sup>-1</sup>, b) from 1300 to 700 cm<sup>-1</sup> and c) from 700 to 300 cm<sup>-1</sup>; below, for the same spectral regions, the synchronous and asynchronous Perturbation-Correlation Moving-Window two-dimensional correlations (PCMW2D) are shown for temperature perturbation from 80°C to 130°C, using the windows size of  $2m + 1 = 3$  for all of them. The white color means positive PCMW2D correlation intensity, while the grey color represents negative correlation intensity. The horizontal lines pinpoint the glass transition temperature and its onset and endset temperatures, as reported in the Figures 4-10.

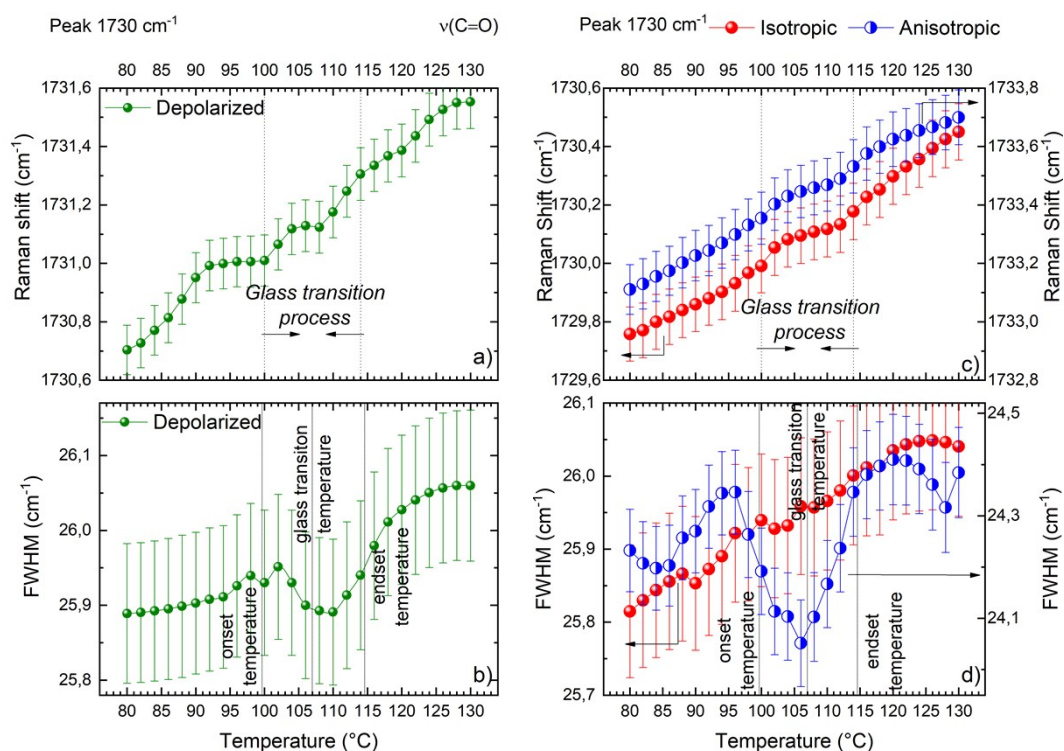

**Supplementary Figure 4.** Raman shift and full width at half maximum (FWHM) of the Raman peak at around  $1730\text{ cm}^{-1}$  associated with  $\nu(\text{C}=\text{O})$  of atactic PMMA, **a)** and **b)** recorded in the depolarized Raman spectrum (green dots), and **c)** and **d)** recorded in the isotropic (red dots) and anisotropic (blue dots) Raman spectrum, as a function of the sample temperature from  $80^\circ\text{C}$  to  $130^\circ\text{C}$ , highlighting the temperature range from  $100^\circ\text{C}$  to  $114^\circ\text{C}$  where the glass transition process takes place, and the pinpointed glass transition temperature at  $107^\circ\text{C}$ .

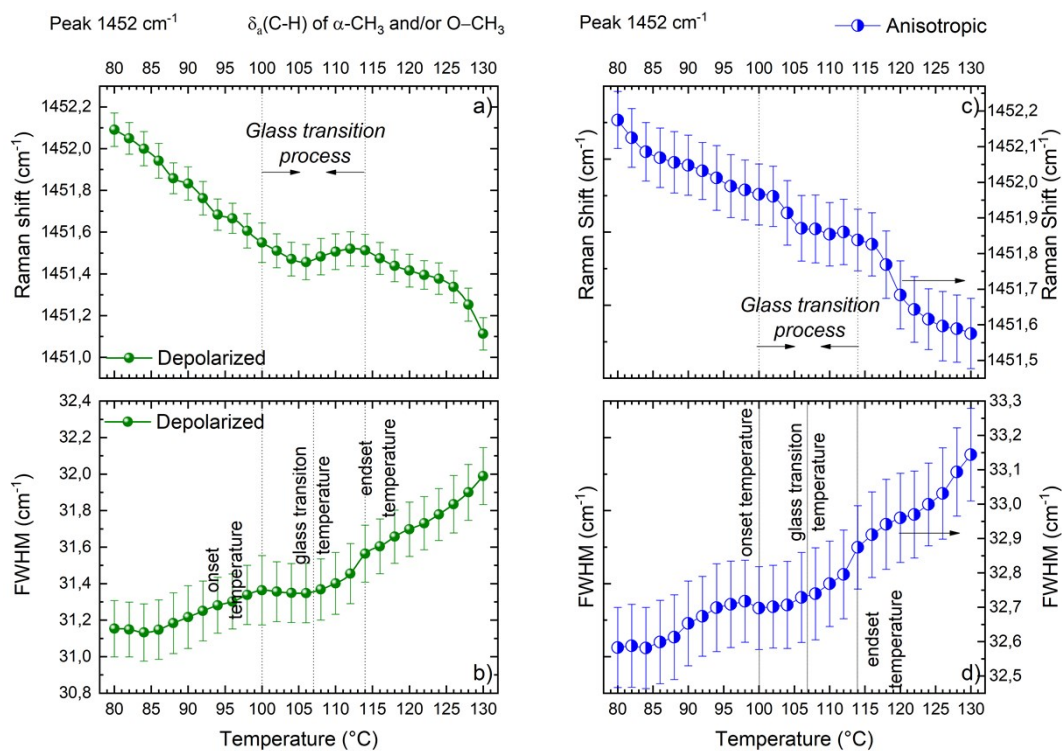

**Supplementary Figure 5.** Raman shift and full width at half maximum (FWHM) of the Raman peak at around 1452 cm<sup>-1</sup> associated with  $\delta_a(\text{C-H})$  of  $\alpha\text{-CH}_3$  and/or O-CH<sub>3</sub> of atactic PMMA, **a)** and **b)** recorded in the depolarized Raman spectrum (green dots), and **c)** and **d)** recorded in the anisotropic Raman spectrum (blue dots), as a function of the sample temperature from 80°C to 130°C, highlighting the temperature range from 100°C to 114°C where the glass transition process takes place, and the pinpointed glass transition temperature at 107°C.

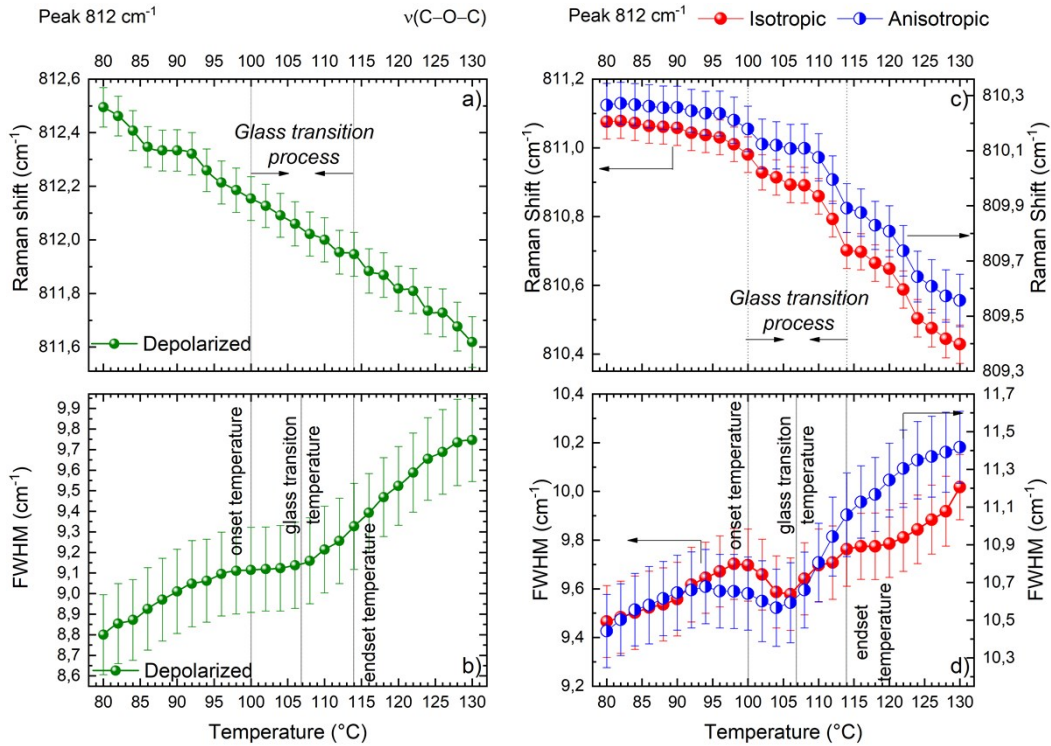

**Supplementary Figure 6.** **a)** Raman shift and full width at half maximum (FWHM) for the Raman peak at around 812 cm<sup>-1</sup> associated with  $\nu(\text{C}-\text{O}-\text{C})$  of atactic PMMA, **a)** and **b)** recorded in the depolarized Raman spectrum (green dots), and **c)** and **d)** recorded in the isotropic (red dots) and anisotropic (blue dots) Raman spectrum, as a function of the sample temperature from 80°C to 130°C, highlighting the temperature range from 100°C to 114°C where the glass transition process takes place, and the pinpointed glass transition temperature at 107°C.

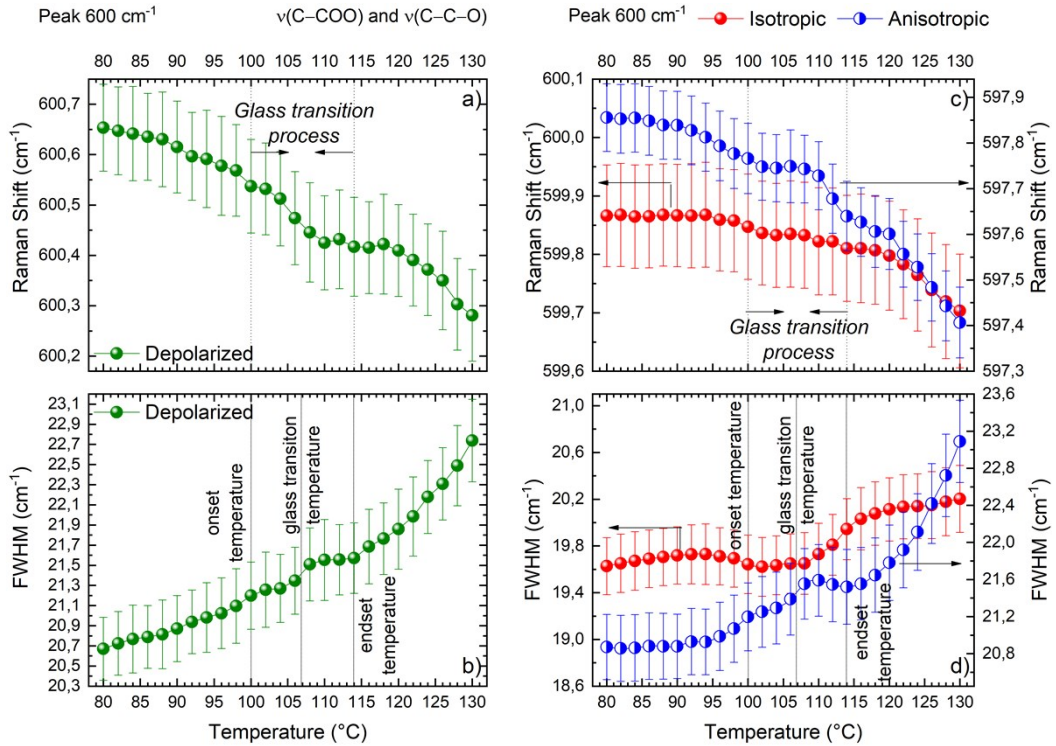

**Supplementary Figure 7.** a) Raman shift and full width at half maximum (FWHM) for the Raman peak at around 600 cm<sup>-1</sup> associated with  $\nu(\text{C}-\text{COO})$ , and with  $\nu(\text{C}-\text{C}-\text{O})$  of atactic PMMA, a) and b) recorded in the depolarized Raman spectrum (green dots), and c) and d) recorded in the isotropic (red dots) and anisotropic (blue dots) Raman spectrum, as a function of the sample temperature from 80°C to 130°C, highlighting the temperature range from 100°C to 114°C where the glass transition process takes place, and the pinpointed glass transition temperature at 107°C.
